# Supplementary material
Source: publisher figshare collection journal article supplement (https://asha.figshare.com/ndownloader/files/37027366)
Supplement: Supplementary file 1 [file 37027366]

**Supplemental Material S1.** Transcripts and measure examples for impairments in content units (CUs), number of syllables (Syll), syllables per CU (SyllCU), and left–right CU (LRCU) for individuals with RH stroke and healthy controls.

| Participant  | Transcript with underlined CU                                                                                                                                                                                                                                                                                                                                                                                                                                                                                                                                                                                                                                                                                                                                                                                                                                                                                                                                        | CUs | Syll | SyllCU | LRCU  |
|--------------|----------------------------------------------------------------------------------------------------------------------------------------------------------------------------------------------------------------------------------------------------------------------------------------------------------------------------------------------------------------------------------------------------------------------------------------------------------------------------------------------------------------------------------------------------------------------------------------------------------------------------------------------------------------------------------------------------------------------------------------------------------------------------------------------------------------------------------------------------------------------------------------------------------------------------------------------------------------------|-----|------|--------|-------|
| <b>RH 15</b> | Um, looks like you and someone’s in, um, <u>kitchen</u> , and they looking out the <u>window</u> , and see like someone <u>cutting grass</u> , and you can see right here that it’s the <u>dishes</u> right there. Um, got a <u>yellow house</u> , <u>blue</u> house, <u>fence</u> I don’t know what that is down at the bottom, <u>sink</u> ...um... <u>cabinet</u> . Um, looks like you and someone’s in, um, <u>kitchen</u> , and they looking’ out the <u>window</u> , and see like someone <u>cutting grass</u> , and you can see right here that it’s the <u>dishes</u> right there. Um, got a <u>yellow house</u> , <u>blue</u> house, <u>fence</u> I don’t know what that is down at the bottom, <u>sink</u> ...um... <u>cabinet</u> ...um, a <u>man standing there</u> like he’s <u>drying off</u> dishes, and a the corner right here with the yellow house there’s like <u>birds</u> or something. And in this corner here, looks like it could be a wall | 14* | 109  | 7.78   | 0.08  |
| <b>RH35</b>  | bad kids <u>wife</u> out <u>mowing</u> the <u>lawn</u> doing his job he in the <u>kitchen</u> <u>messing everything up</u> not <u>watching</u> kids or they some bad kids then the <u>dog</u> is getting ready to get under under the darn <u>stool</u> oh lord and he <u>ain’t paying no attention</u> he’s off in some other world just some <u>water’s running oh-out</u> the <u>sink</u> and he still ain’t pulindo I could see my wife walking in there seeing that going on see that that would remind me of something that the darn foster kids would be doing you know terry that poor                                                                                                                                                                                                                                                                                                                                                                       | 13* | 123  | 9.46*  | 0.375 |
| <b>RH51</b>  | <u>Mowing</u> the <u>lawn</u> . <u>Dishes</u> in the <u>sink</u> ... <u>Man</u> <u>washing</u> dishes                                                                                                                                                                                                                                                                                                                                                                                                                                                                                                                                                                                                                                                                                                                                                                                                                                                                | 6*  | 14*  | 2.3*   | 0*    |
| <b>HC45</b>  | Okay. It’s a family in a <u>kitchen</u> . And <u>dad</u> is doing the <u>dishes</u> with the <u>sink</u> <u>overflowing</u> and then <u>behind</u> him, we’ve got the <u>kids</u> <u>trying to get</u> the <u>cookies</u> out and <u>falling off</u> of a <u>step stool</u> . We’ve got a <u>dog</u> in there <u>eating</u> up the <u>spilled</u> cookies. <u>Mom</u> is out <u>talking on the phone</u> , her cell phone <u>mowing</u> the <u>lawn</u> . We’ve got a <u>black cat</u> out there ready to spring on a <u>little bird</u> . <<Umm>>, dad is drying the dishes but he doesn’t seem to be pay- <u>+paying much attention</u>                                                                                                                                                                                                                                                                                                                            | 33  | 252  | 7.6    | 0.67  |

|      |                                                                                                                                                                                                                                                                                                                                                                                                                                                                                                                                                                                                                                                                                                                                                                                                                                                                                                  |    |     |     |      |
|------|--------------------------------------------------------------------------------------------------------------------------------------------------------------------------------------------------------------------------------------------------------------------------------------------------------------------------------------------------------------------------------------------------------------------------------------------------------------------------------------------------------------------------------------------------------------------------------------------------------------------------------------------------------------------------------------------------------------------------------------------------------------------------------------------------------------------------------------------------------------------------------------------------|----|-----|-----|------|
|      | to the sink overflowing. Little <u>girl</u> looks like she is <u>helping</u> her <u>brother</u> but she is really not. She is just eating the cookies and looks like in just a few minutes, we are going to hear a big crash because the little boy is going to fall off that stool and <<umm>>, it looks like mom is cutting down her <u>flowers</u> instead of the lawn and otherwise we've got a nice, neat kitchen except for the cookies that are <u>on the floor</u> . And brother is <u>wearing</u> a shi- +a <u>stripe shirt</u> and sis is wearing a ss.. stripe shirt.                                                                                                                                                                                                                                                                                                                 |    |     |     |      |
| HC37 | <<Ah>> there is a <u>boy grabbing cookies</u> from the <u>counter falling off</u> of a <u>stool</u> . His <u>sister is laughing</u> at him. There is a <u>dog</u> near the stool. The fa- + <u>father</u> is at the <u>sink</u> and the sink is <u>overflowing</u> . <u>Outside the window</u> , there is a <u>woman mowing the lawn</u> while <u>talking on the phone</u> , cell phone. There is a <u>cat playing</u> with some <u>birds</u> . It seems to be a city with several <u>buildings</u> . There are <u>curtains</u> that are <u>pink</u> . There is a dog <u>eating</u> cookies that are falling <u>on to the floor</u> . The <u>guy</u> has <u>brown hair</u> . {No he} <Laughs> <<Okay, it's like do I have to keep talking all the time, I am from New York, can we talk fast?>> <Laughs> {All right. You have to put your finger and press hold, okay. A nano second, let's say} | 28 | 122 | 4.4 | 0.71 |
| HC48 | <u>Dad</u> is <u>washing</u> the <u>dishes</u> while <u>mom</u> is <u>outside mowing the lawn</u> , <u>talking on the cell phone</u> and the <u>cat</u> is <u>behind</u> her on the lawn <u>chasing</u> the <u>birds</u> and the <u>son</u> - +the dad is supposed to be watching the <u>kids</u> and the son is <u>standing</u> on a <u>step stool trying to get the cookies out of the shelf</u> and he is going to <u>knock them down</u> and the <u>daughter</u> is <u>eating</u> the cookies as he's dropping them and the <u>dog</u> is licking the cookies <u>off of the floor</u> . And the dad is supposed to be doing the dishes and he is <u>not paying any attention</u> and the sub- + <u>suds</u> are <u>going all over</u> the floor and the counter and <<umm>> <<that's all I can say. Great, I think I covered it all.>>                                                       | 27 | 145 | 5.4 | 0.73 |

*Note.* RH = right hemisphere; HC = healthy control; \* = 1.5 standard deviation above or below the norm.
